# Supplementary material for: Catalytic conversion of heavy naphtha to reformate over the phosphorus-ZSM-5 catalyst at a lower reforming temperature
Source: Royal Society of Chemistry journal article supplement (doi:10.1039/d2ra04092a), 2022-01-01
Supplement: d2ra04092a1.pdf [file d2ra04092a1.pdf]

# Supporting Information

## Catalytic conversion of heavy naphtha to reformat product over phosphorus-ZSM-5 catalyst at lower reforming temperature

Emad N. Al-Shafei<sup>1\*</sup>, Mohammed Z. Albahar<sup>1\*</sup>, Mohammad F, AlJishi<sup>1</sup>, Aaron Akah<sup>1</sup>, Ali N. Jishi<sup>1</sup>,  
Ahmed Alasseel<sup>1</sup>,

<sup>1</sup> Research and Development Center, Saudi Aramco, Dhahran 31311, Saudi Arabia.

\*Corresponding authors: EMAD.SHAFEI@ARAMCO.COM, emadnaji@gmail.com

### Contents

|                                                                                                                                                                                   | Page |
|-----------------------------------------------------------------------------------------------------------------------------------------------------------------------------------|------|
| Table 1S. Nitrogen adsorption analysis and NH <sub>3</sub> -TPD profiles of modified ZSM-5 and after reaction                                                                     | 3    |
| Table 2S. Metal analysis of zeolite catalysts                                                                                                                                     | 5    |
| Figure 1S. Schematic diagram of dodecane cracking and reforming via phosphate modified ZSM-5 zeolite catalyst                                                                     | 2    |
| Figure 2S. XRD patterns of hydrothermally treated with steam ZSM-5 zeolite catalysts with binder and after reaction                                                               | 3    |
| Figure 3S. [A] N <sub>2</sub> adsorption-desorption isotherms [B] pore size distribution curves of parent and modified ZSM-5 zeolite with binder before and after reaction (coke) | 4    |
| Figure 4S. [A] Py-FTIR of 40% ZSM-5 in 60% binder, [B] Py-FTIR of 40% ZSM-5 in 60% binder (HT)                                                                                    | 4    |
| Figure 5S. SEM images [A] 40% ZSM-5 in 60% binder, [B] 40% ZSM-5 in 60% binder after steam treatment                                                                              | 5    |
| Figure 6S Gas-chromatograph of n-dodecane conversion over 40% ZSM-5 in 60% binder after steam treatment                                                                           | 6    |

### 3. Results and Discussion

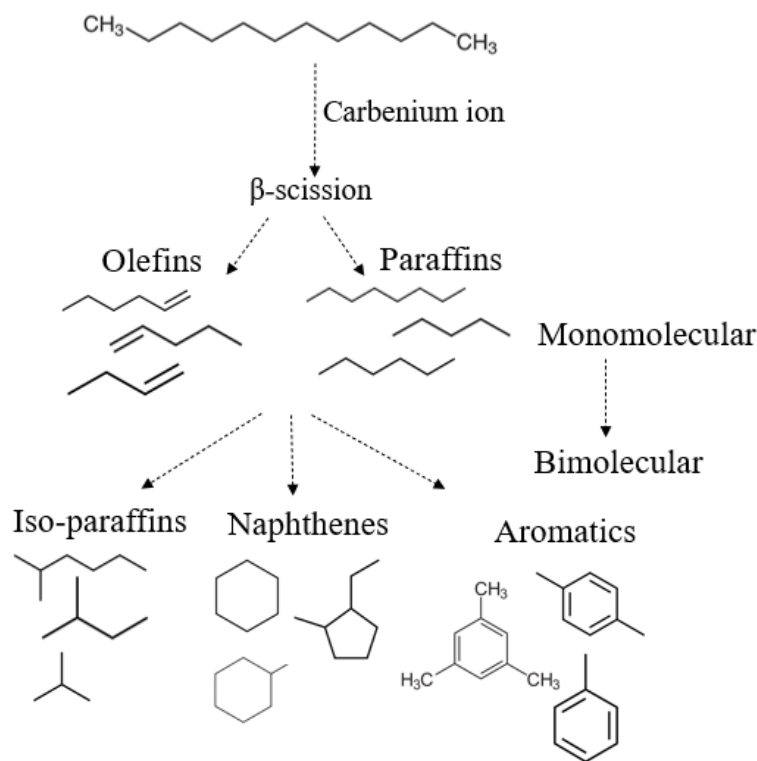

Figure 1S. Schematic diagram of dodecane cracking and reforming via phosphate modified ZSM-5 zeolite catalyst

Figure 1S shows the schematic diagram of dodecane reforming through the carbenium ions via phosphate modified ZSM-5 zeolite catalyst pores and it favored monomolecular reaction through  $\beta$ -scission of dodecane and made high paraffin and olefin (~58%). While bimolecular was also associated with the reaction and promoted the iso-paraffins product via isomerization reaction [1]–[3]. While the parent ZSM-5 (P) showed the pores selectivity favored to the cyclization reaction and produce aromatics and naphthenes products through bimolecular reaction pathway more than the monomolecular reaction pathway [4], [5].

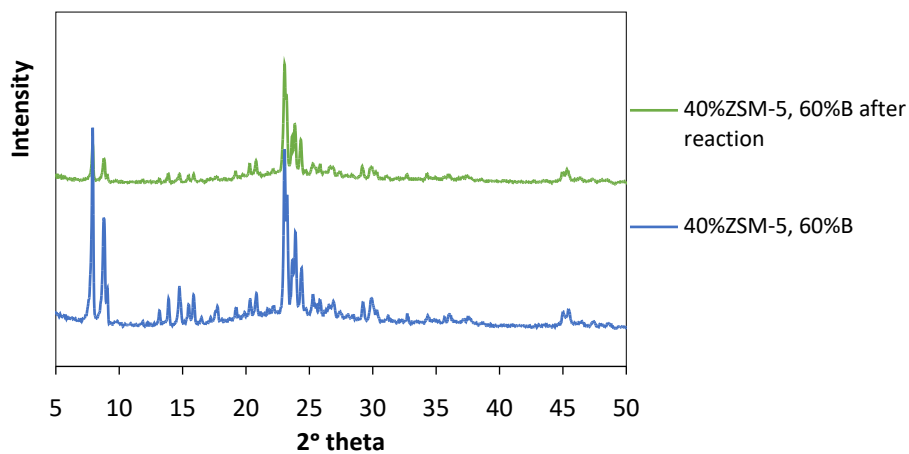

Figure 2S. XRD patterns of hydrothermally treated with steam ZSM-5 zeolite catalysts with binder  
And after reaction

Table 1S. Nitrogen adsorption analysis and NH<sub>3</sub>-TPD profiles of parent and modified ZSM-5

| Zeolite ID                           | BET surface area [m <sup>2</sup> g <sup>-1</sup> ] | t-Plot* micropore surface area, [m <sup>2</sup> g <sup>-1</sup> ] | t-Plot* external surface area, [m <sup>2</sup> g <sup>-1</sup> ] | Pore Volume, [cm <sup>3</sup> g <sup>-1</sup> ] |
|--------------------------------------|----------------------------------------------------|-------------------------------------------------------------------|------------------------------------------------------------------|-------------------------------------------------|
| 40% ZSM-5, 60% binder                | 164                                                | 103                                                               | 61                                                               | 0.16                                            |
| 40% ZSM-5, 60% binder HT**           | 170                                                | 106                                                               | 64                                                               | 0.15                                            |
| 40% ZSM-5, 60% binder after reaction | 137                                                | 76                                                                | 61                                                               | 0.14                                            |

\* Surface area by t-plot derived from Harkins and Jura equation, \*\*HT: hydrotreatment treatment by steam

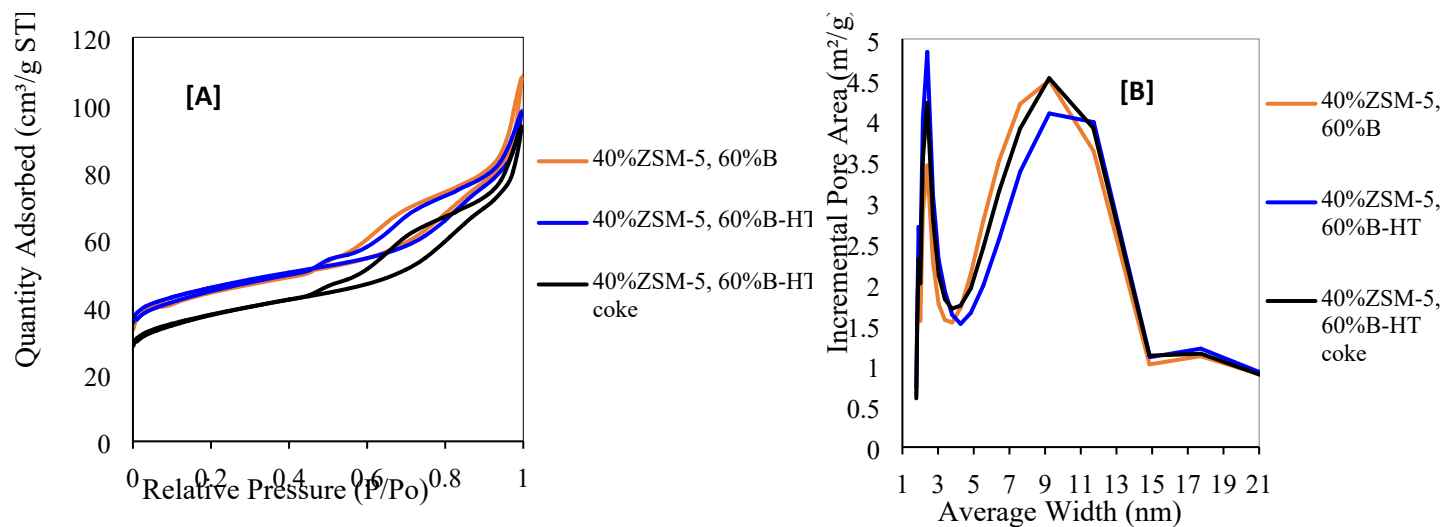

Figure 3S. [A] N<sub>2</sub> adsorption-desorption isotherms [B] pore size distribution curves of parent and modified ZSM-5 zeolite with binder before and after reaction (coke)

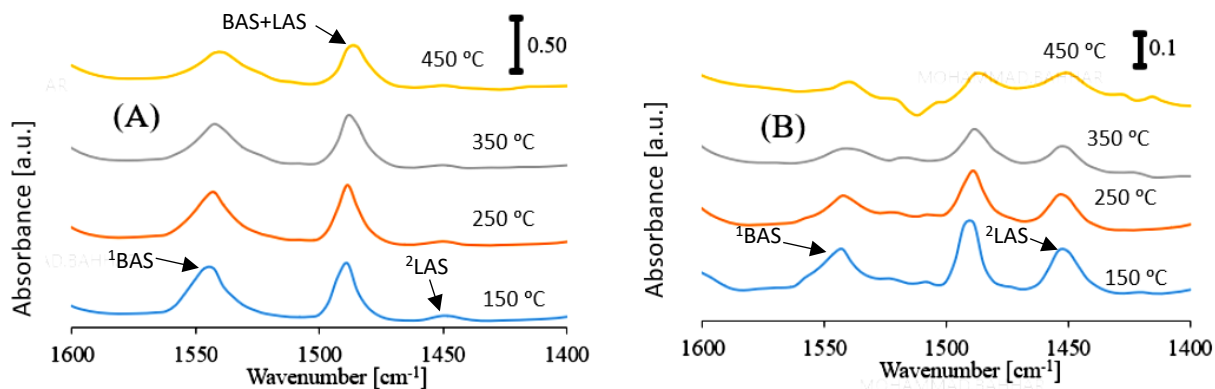

Figure 4S. (A) Py-FTIR of 40% ZSM-5 in 60% binder, (B) Py-FTIR of 40% ZSM-5 in 60% binder (HT) (<sup>1</sup>BAS: Brønsted acid sites, <sup>2</sup>LAS: Lewis acid sites)

Table S2. Metal analysis of zeolite catalysts

| Sample ID                   | O    | Al   | Si   | P   |
|-----------------------------|------|------|------|-----|
| 40% ZSM-5, 60% binder       | 48   | 16.3 | 33.6 | 2.1 |
| 40% ZSM-5, 60% binder – HT* | 61.6 | 12.4 | 24.6 | 1.4 |

\*HT: hydrothermal treatment by steam, ND: not detected

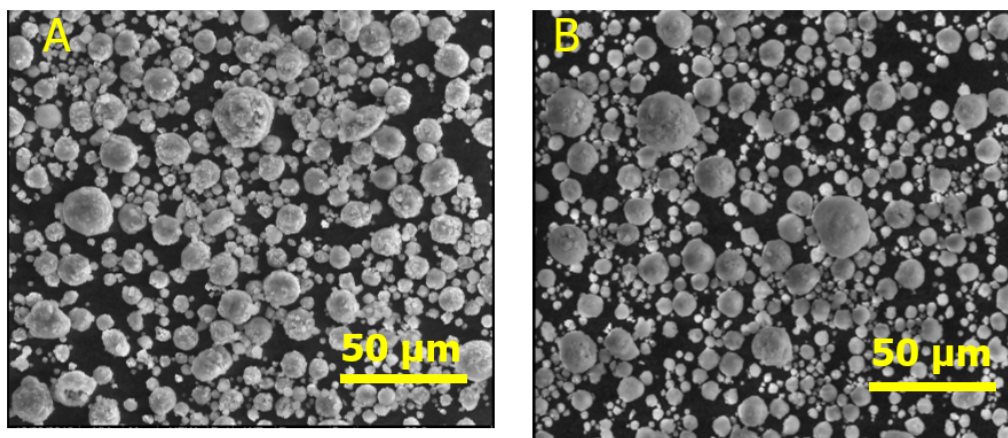

Figure 5S. SEM images [A] 40% ZSM-5 in 60% binder, [B] 40% ZSM-5 in 60% binder after steam treatment

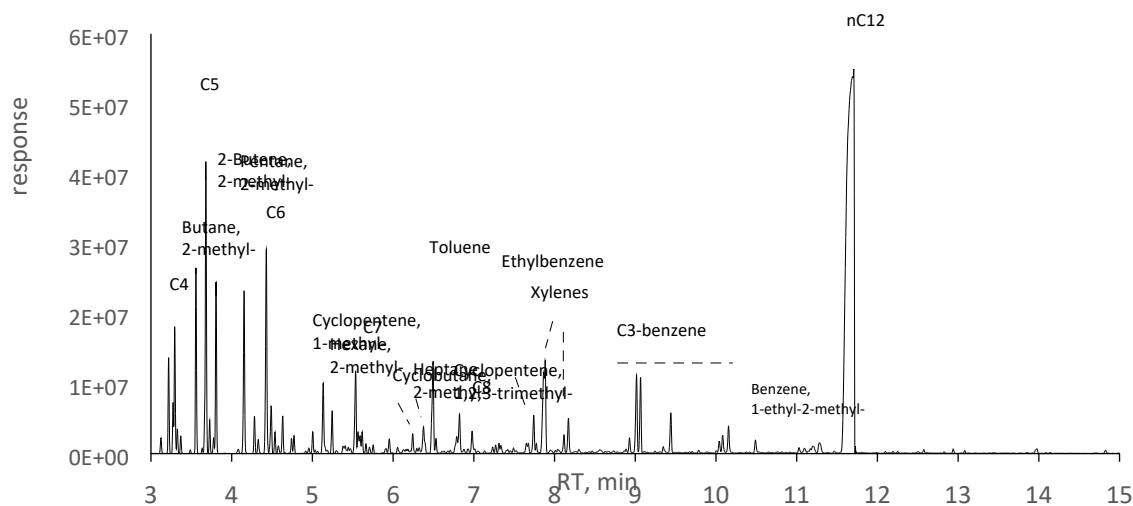

Figure 6S. Gas-chromatograph of n-dodecane conversion over 40% ZSM-5 in 60% binder after steam treatment

## References

- [1] M. Alabdullah *et al.*, “One-step conversion of crude oil to light olefins using a multi-zone reactor,” *Nature Catalysis*, vol. 4, no. 3, pp. 233–241, 2021.
- [2] M. Alabdullah *et al.*, “Composition-performance Relationships in Catalysts Formulation for the Direct Conversion of Crude Oil to Chemicals,” *ChemCatChem*, vol. 13, no. 7, pp. 1806–1813, 2021.
- [3] J. Jiang, J. Yu, and A. Corma, “Extra-large-pore zeolites: bridging the gap between micro and mesoporous structures,” *Angewandte Chemie International Edition*, vol. 49, no. 18, pp. 3120–3145, 2010.
- [4] H. Krannila, W. O. Haag, and B. C. Gates, “Monomolecular and bimolecular mechanisms of paraffin cracking: n-butane cracking catalyzed by HZSM-5,” *Journal of Catalysis*, vol. 135, no. 1, pp. 115–124, 1992.
- [5] E. N. Al-Shafei *et al.*, “Naphtha catalytic cracking to olefins over zirconia-titania catalyst,” *React. Chem. Eng.*, p., 2021, doi: 10.1039/D1RE00290B.
